# Supplementary material
Source: HighWire-hosted journal article supplement (https://bmjopensem.bmj.com/content/4/1/e000324)
Supplement: inline-supplementary-material-1 [file inline-supplementary-material-1.docx]

**Appendix Table 1:** Injury characteristics and self-reported contributors in full-time and part-time dancers

| **Characteristic** | **Injured part-time dancers**  **(n=36)** | **Injured full-time dancers**  **(n=71)** | **p value** |
| --- | --- | --- | --- |
| Injury characteristic | | | |
| Injury was traumatic (n (%)) | 10 (27.7) | 20 (28.2) | 0.533 |
| Injury was overuse (n (%)) | 20 (55.5) | 42 (59.2) | 0.172 |
| Injury occurred in class (n (%)) | 5 (13.9) | 15 (21.1) | 0.219 |
| Injury occurred during rehearsal (n (%)) | 13 (36.1) | 17 (23.9) | 0.676 |
| Injury occurred during performance (n (%)) | 3 (8.3) | 12 (16.9) | 0.162 |
| Injury was cumulative (n (%)) | 14 (38.9) | 26 (36.6) | 0.574 |
| Potential injury contributor | | | |
| Warm up before class (n (%)) | 44 (83) | 82 (95.3) | **0.032** |
| Warm up before rehearsal (n (%)) | 51 (96.2) | 77 (89.5) | 0.205 |
| Warm up before performance (n (%)) | 53 (100) | 83 (96.5) | 0.287 |
| Cool down after class (n (%)) | 34 (63) | 29 (34.1) | **0.002** |
| Cool down after rehearsal (n (%)) | 36 (66.7) | 42 (49.4) | **0.055** |
| Cool down after performance (n (%)) | 22 (41.5) | 24 (28.2) | 0.138 |
| Injury occurred <3 weeks after returning from break (n (%)) | 9 (25.7) | 8 (11.4) | 0.090 |
| Fatigue identified as contributing factor (n (%)) | 19 (52.8) | 31 (43.7) | 1 |
| Dance environment identified as contributing factor (n (%)) | 5 (13.9) | 12 (16.9) | 0.440 |
| Choreography identified as contributing factor (n (%)) | 18 (50) | 22 (31.0) | 0.447 |
| Partner work identified as contributing factor (n (%)) | 7 (19.4) | 7 (9.9) | 0.400 |
| Ignoring early warning signs identified as contributing factor (n (%)) | 14 (38.9) | 18 (25.4) | 0.545 |
| Other factors identified as contributing factor (n (%)) | 9 (25) | 22 (31.0) | 0.220 |
| Health care accessed | | | |
| Health service was associated with dance employment (n (%)) | 13 (36.1) | 59 (83.1) | **<0.001** |
| Clinician accessed was specialised in dance (n (%)) | 18 (50.0) | 53 (74.6) | **0.001** |
| Median days taken to access health service (days (IQR)) | 2 (13) | 1 (4) | **0.016** |
| Health service payment by dancer (n (%)) | 23 (63.9) | 17 (23.9) | **0.005** |
| Health service payment by employer or workers compensation (n (%)) | 13 (36.1) | 63 (88.7) | **<0.001** |
| Injury implications | | | |
| Unable to dance in any capacity (n (%)) | 2 (5.6) | 15 (21.1) | **0.016** |
| Some modifications were made to continue dancing (n (%)) | 28 (77.8) | 47 (66.2) | 0.735 |
| This injury will have a long term impact on my dancing (n (%)) | 13 (36.1) | 28 (39.4) | 1 |
| Injury impacted my activities of daily living (n (%)) | 18 (50) | 30 (42.3) | 0.411 |
| Days to return to full class (median (IQR)) | 14 (48)  n= 23 | 14 (29)  n=55 | 0.283 |
| Days to return to full rehearsal (median (IQR)) | 14 (55)  n= 23 | 7 (30)  n=55 | 0.128 |
| Days to return to full performance (median (IQR)) | 14 (93)  n= 23 | 7 (31)  n=55 | 0.101 |

Significant p values are boldface
